# Supplementary material for: Human versus Rat PRF on Collagen Membranes: A Pilot Study of Mineralization in Rat Calvaria Defect Model
Source: MDPI journal article supplement (doi:10.3390/bioengineering11050414), 2024-04-23
Supplement: s1 [file s1]

### Supplementary Material

**Table S1.** Post hoc for BV/TV (%) comparing Empty defect with human and Rat PRF.

|              | Values | Sigma | Values |
|--------------|--------|-------|--------|
| ED vs. h-PRF | 0.02   | 0.00  | <0.001 |
| ED vs. r-PRF | -0.00  | 0.01  | 0.998  |

**Table S2.** Post hoc for Coverage (%) comparing Empty defect with human and Rat PRF.

|              | Values | Sigma | Values  |
|--------------|--------|-------|---------|
| ED vs. h-PRF | -0.04  | 0.00  | <0.001  |
| ED vs. r-PRF | -0.26  | 0.08  | 0.00373 |
